# Supplementary material for: Enhancement of Methanogenic Activity in Volumetrically Undersized Reactor by Mesophilic Co-Digestion of Sewage Sludge and Aqueous Residue
Source: MDPI journal article supplement (doi:10.3390/su13147728), 2021-07-10
Supplement: s1 [file s1]

Supplementary file

# Enhancement of Methanogenic Activity in Volumetrically Undersized Reactor by Mesophilic Co-Digestion of Sewage Sludge and Aqueous Residue

Vincenzo Torretta <sup>1</sup>, Athanasia K. Tolkou <sup>2</sup>, Ioannis A. Katsoyiannis <sup>2</sup>, Francesca Maria Caccamo <sup>3</sup>, Marco Carnevale Miino <sup>3</sup>, Marco Baldi <sup>4</sup> and Maria Cristina Collivignarelli <sup>3,5</sup>

<sup>1</sup> Department of Theoretical and Applied Sciences, Insubria University of Varese, via G.B. Vico, 46, 21100 Varese, Italy; [vincenzo.torretta@uninsubria.it](mailto:vincenzo.torretta@uninsubria.it) (V.T.)

<sup>2</sup> Department of Chemistry, Aristotle University of Thessaloniki, 54124 Thessaloniki, Greece; [tolka-tha@chem.auth.gr](mailto:tolka-tha@chem.auth.gr) (A.K.T.); [katsogia@chem.auth.gr](mailto:katsogia@chem.auth.gr) (I.A.K.)

<sup>3</sup> Department of Civil Engineering and Architecture, University of Pavia, via Ferrata 3, 27100 Pavia, Italy; [francescamaria.caccamo01@universitadipavia.it](mailto:francescamaria.caccamo01@universitadipavia.it) (F.M.C.); [marco.carnevalemiino01@universitadipavia.it](mailto:marco.carnevalemiino01@universitadipavia.it) (M.C.M.); [mcristina.collivignarelli@unipv.it](mailto:mcristina.collivignarelli@unipv.it) (M.C.C.)

<sup>4</sup> Department of Chemistry, University of Pavia, viale Taramelli 12, 27100 Pavia, Italy; [marco.baldi@unipv.it](mailto:marco.baldi@unipv.it) (M.B.)

<sup>5</sup> Interdepartmental Centre for Water Research, University of Pavia, via Ferrata 3, 27100, Pavia, Italy

\* Correspondence: [tolkatha@chem.auth.gr](mailto:tolkatha@chem.auth.gr) (A.K.T.); Tel.: (+30)-2310-997997

## SUPPLEMENTARY FILE S1

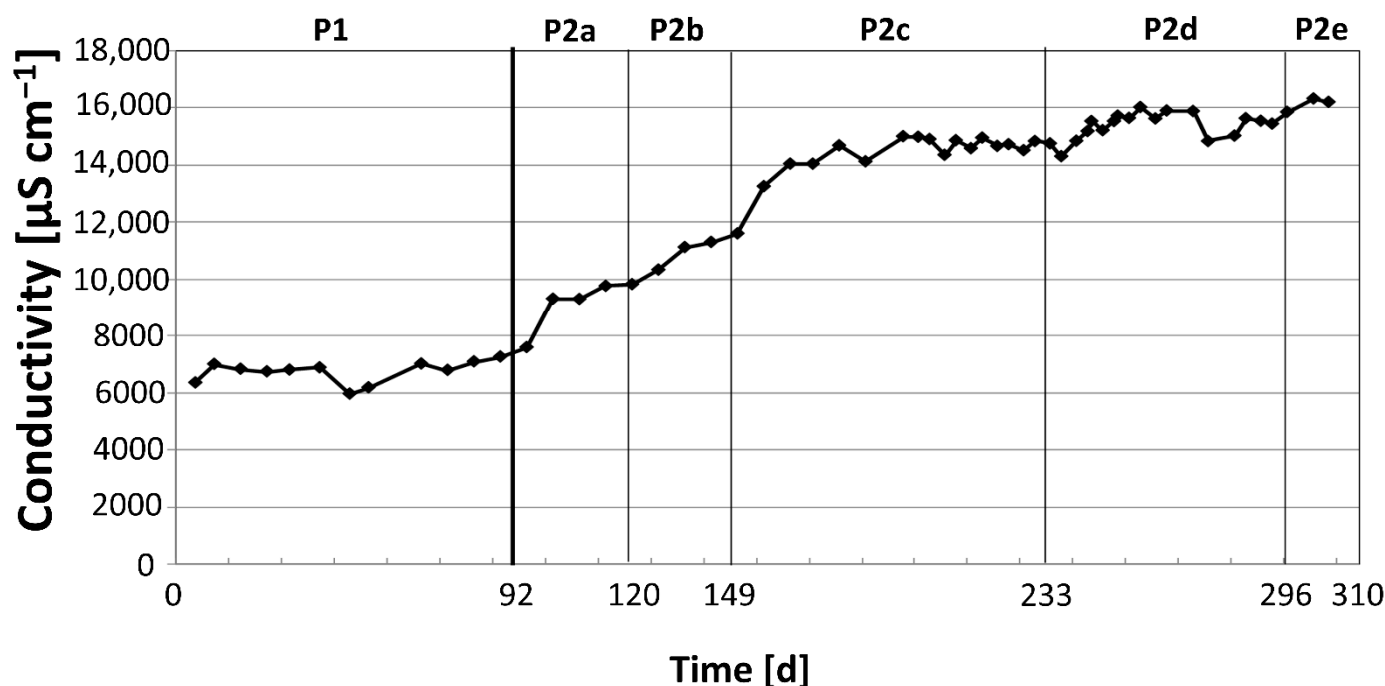

Figure S1. Conductivity in the anaerobic digester during the experimentation.
